# Supplementary material for: On-line solid phase extraction-hydride generation atomic fluorescence spectrometric determination of trace arsenic in high purity antimony(iii) oxide
Source: Royal Society of Chemistry journal article supplement (doi:10.1039/b915054d), 2009-11-18
Supplement: b915054d.pdf [file b915054d.pdf]

## Supplementary information(ESI)

**Table S1** HG-AFS operating parameters and SPE conditions

| Parameters                            | Values                                          |
|---------------------------------------|-------------------------------------------------|
| As hollow cathode lamp                |                                                 |
| Primary current                       | 60mA                                            |
| Boost current                         | 30mA                                            |
| Quartz furnace height                 | 8mm                                             |
| Negative high voltage photomultiplier | 270V                                            |
| Reductant                             | 1.5% (m/v) NaBH <sub>4</sub> in 0.5% (m/v) NaOH |
| Sample acid concentration             | 10.8 mol L <sup>-1</sup>                        |
| Sample solution loading rate          | 0.5 mL min <sup>-1</sup>                        |
| Wash time                             | 100 s                                           |
| Elution solution concentration        | 0.06 mol L <sup>-1</sup>                        |
| Elution solution flow rate            | 15 mL min <sup>-1</sup>                         |

**Table S2** Operating conditions for CCT-ICP-MS

|                                  |                            |
|----------------------------------|----------------------------|
| Isotope                          | <sup>75</sup> As           |
| Internal standard                | <sup>115</sup> In          |
| Rf power                         | 1400 W                     |
| Cooling gas flow rate            | 13 L min <sup>-1</sup>     |
| Auxiliary gas flow rate          | 0.8 L min <sup>-1</sup>    |
| Nebuliser gas flow rate          | 0.95 ml min <sup>-1</sup>  |
| Points per peak                  | 5                          |
| Dwell time                       | 100 ms                     |
| Detection mode                   | Peak jump                  |
| Collision/reaction gas           | 5% H <sub>2</sub> - 95% He |
| Collision/reaction gas flow rate | 5.45 mL min <sup>-1</sup>  |

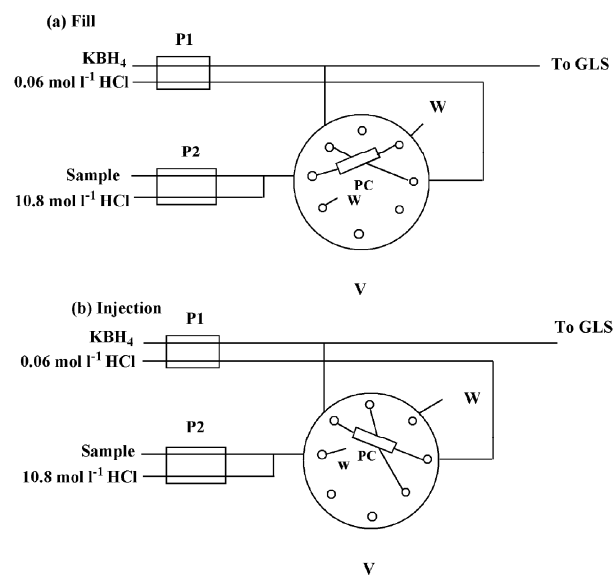

**Fig. S1** FI manifold for the on-line separation and preconcentration, P1 and P2, peristaltic pump; W, waste; PC, SPE packed column; V, injection valve; GLS, gas-liquid separator.
